# Supplementary material for: Effects of High Glucose on Human Endothelial Cells Exposed to Simulated Microgravity
Source: MDPI journal article supplement (doi:10.3390/biom13020189), 2023-01-17
Supplement: s1 [file s1]

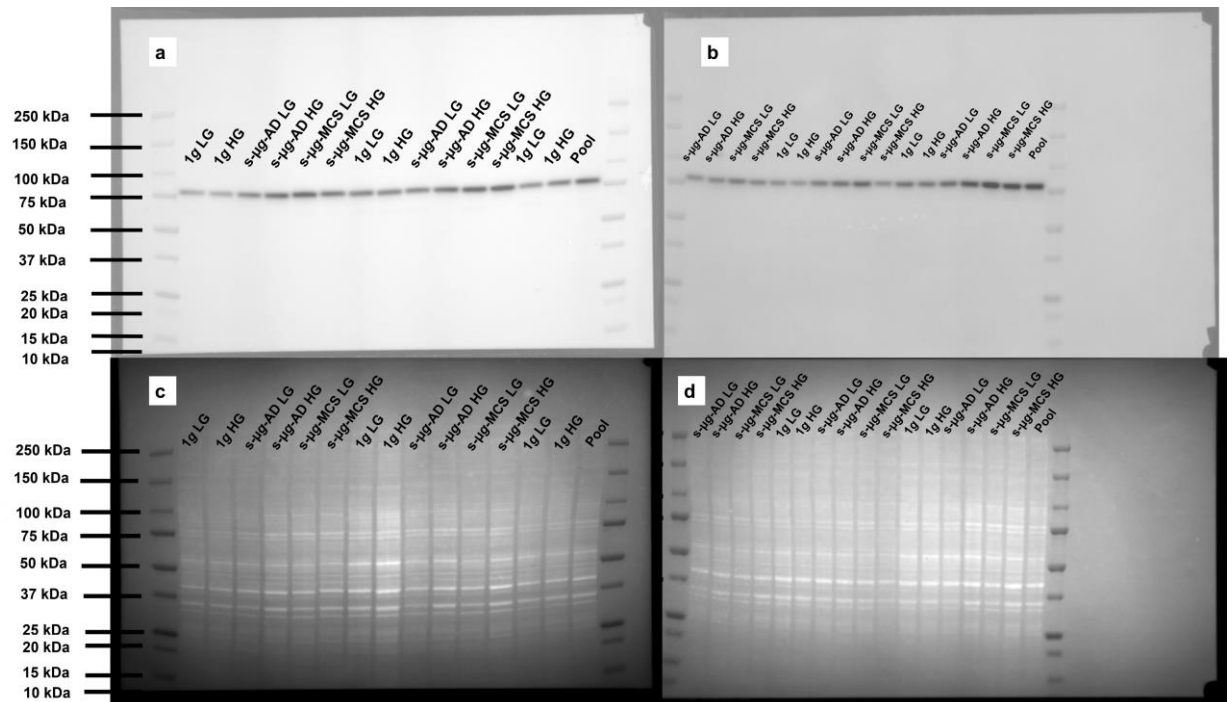

**Figure S1.** Full-length Western blot images for transglutaminase-2 (TG2): **a)** 1<sup>st</sup> blot after development with ECL, **b)** 2<sup>nd</sup> blot after development with ECL, **c)** 1<sup>st</sup> membrane after transfer for total protein quantification, **d)** 2<sup>nd</sup> membrane after transfer for total protein quantification. n = 5

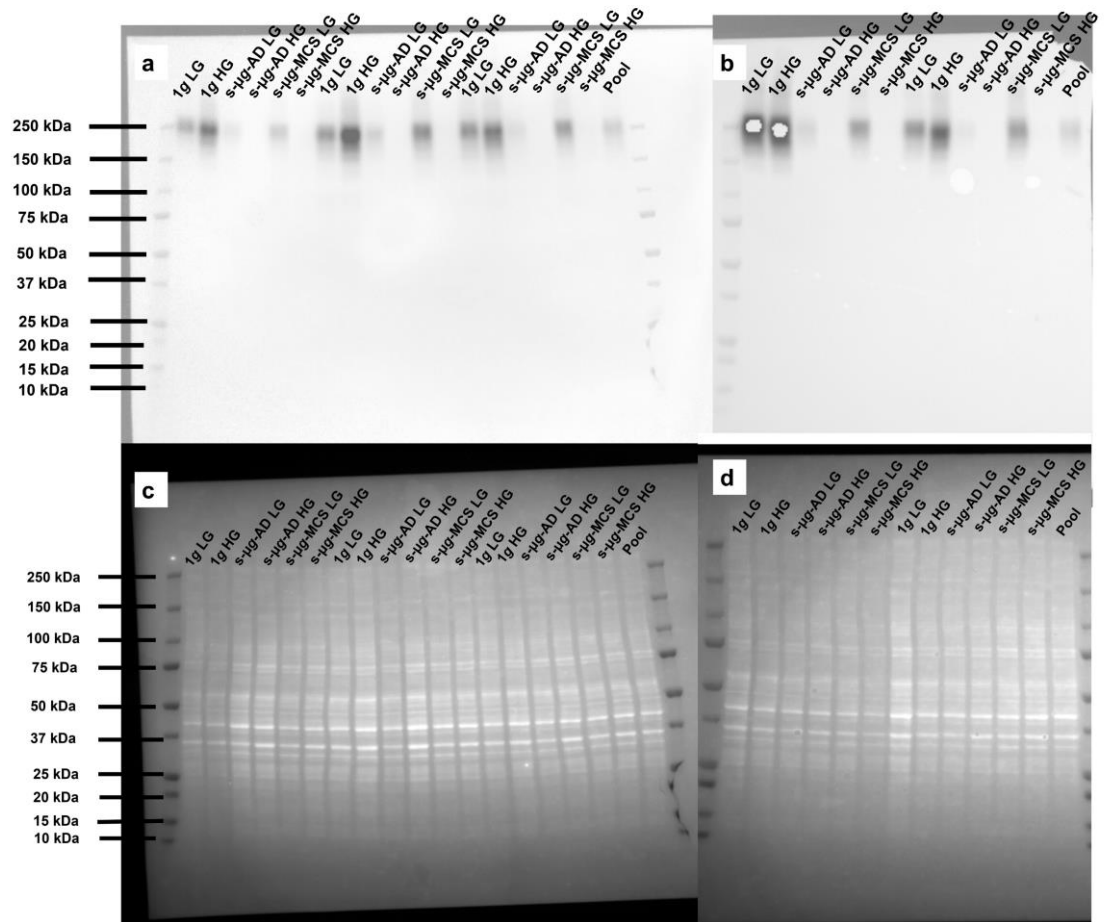

**Figure S2.** Full-length Western blot images for fibronectin (FN1). **a)** 1<sup>st</sup> blot after development with ECL, **b)** 2<sup>nd</sup> blot after development with ECL, **c)** 1<sup>st</sup> membrane after transfer for total protein quantification, **d)** 2<sup>nd</sup> membrane after transfer for total protein quantification. n = 5, overexposed 1g LG and 1g HG samples were excluded.

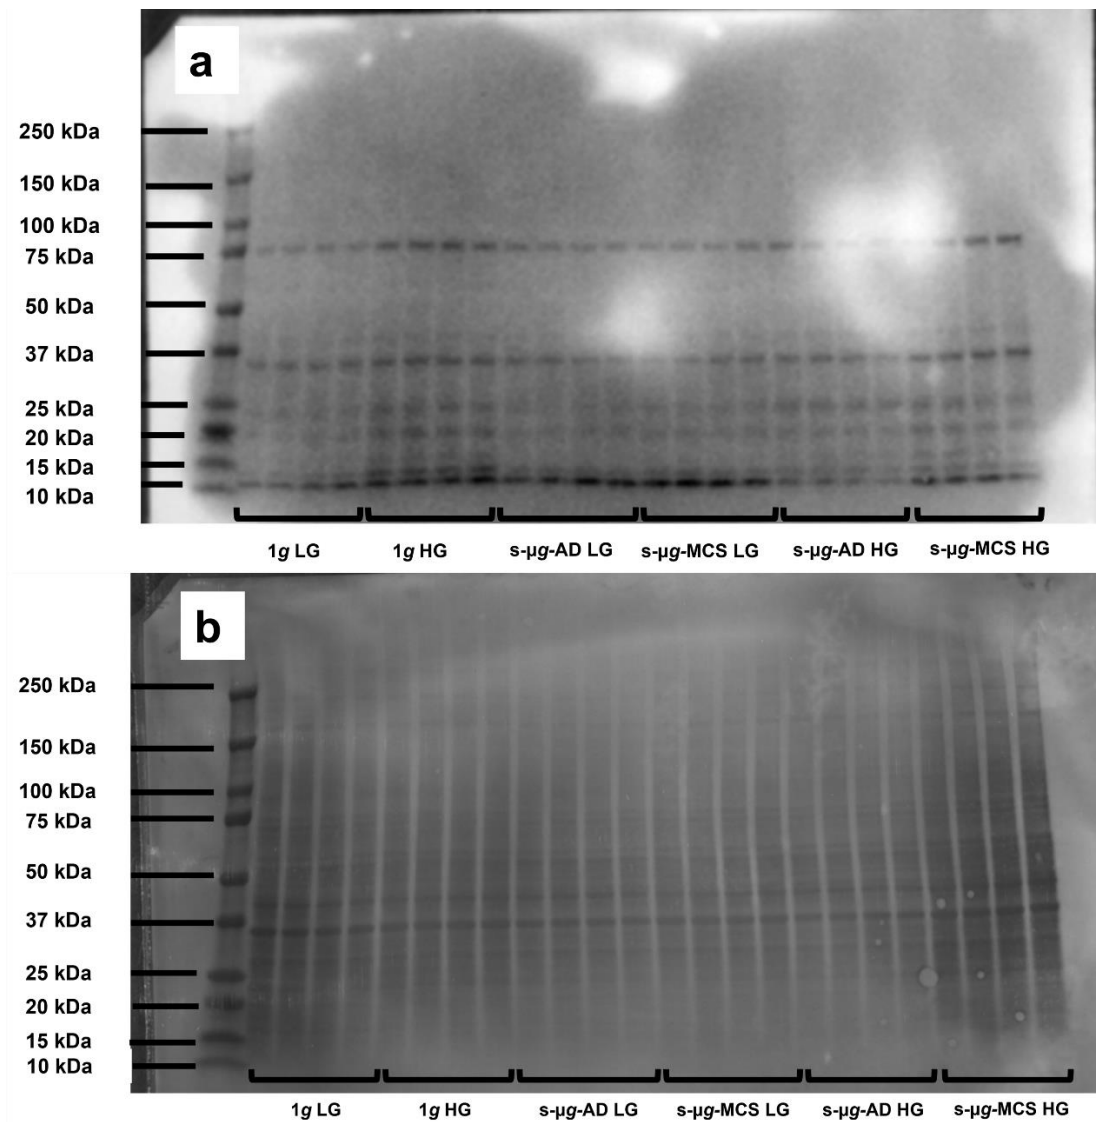

**Figure S3.** Full-length Western blot images for caspase-3 (CASP3). **a)** Full blot after development with ECL, **b)** Membrane after transfer for total protein quantification.  $n = 4$

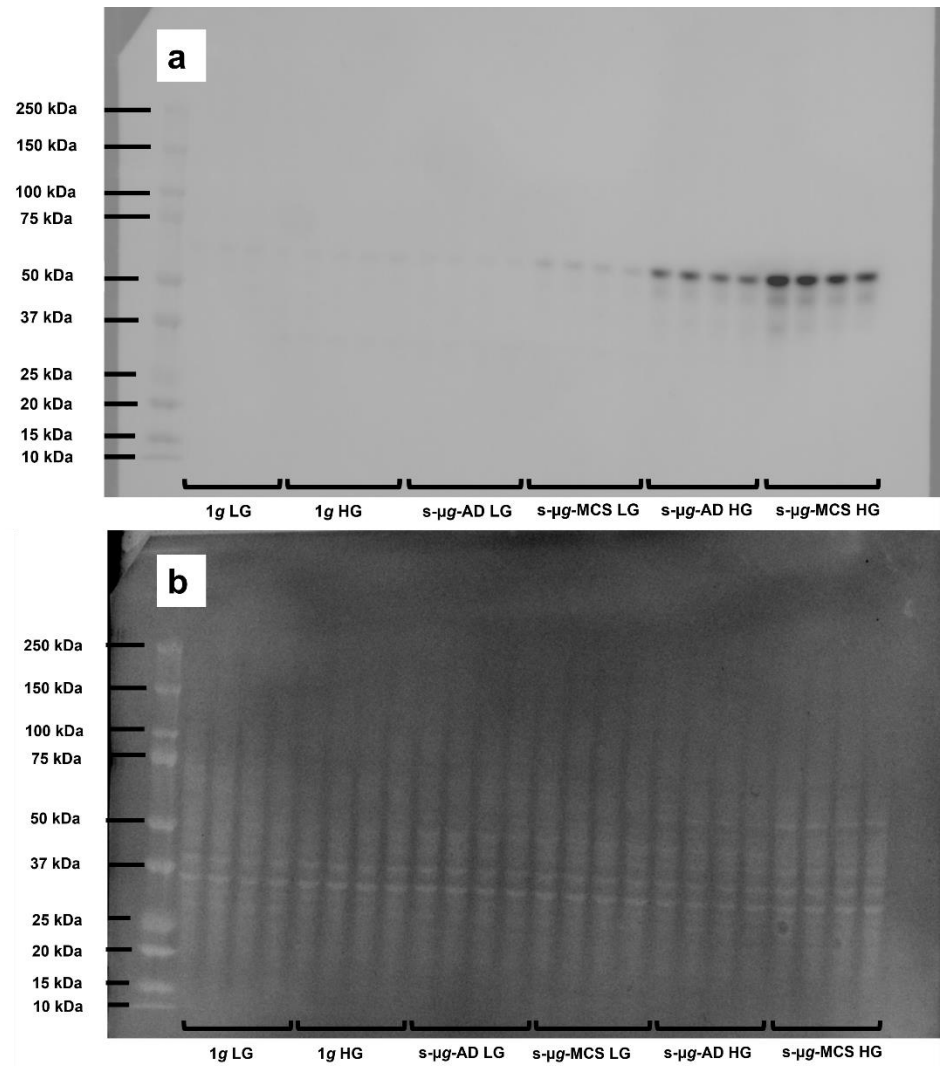

**Figure S4.** Full-length Western blot images for NF-κB p65. **a)** Full blot after development with ECL, **b)** Membrane after transfer for total protein quantification. n = 4

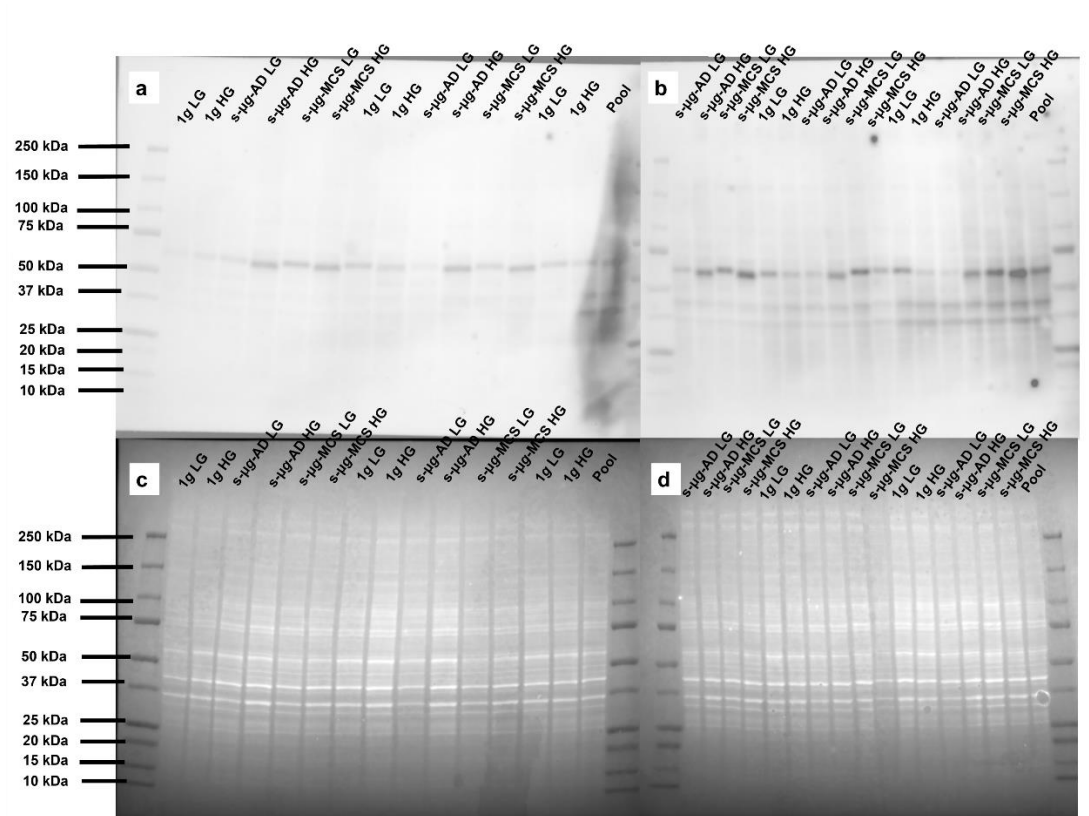

**Figure S5.** Full-length Western blot images for NADPH oxidase 4 (NOX4). **a)** Full blot after development with ECL, **b)** Membrane after transfer for total protein quantification. n = 5
